# Supplementary material for: Does gender influence outcome measures similarly in patients with spondyloarthritis? Results from the ASAS-perSpA study
Source: PubMed Central journal article supplement — RMD Open. 2022 Sep 12;8(2):e002514. doi: 10.1136/rmdopen-2022-002514 (PMC9472201; doi:10.1136/rmdopen-2022-002514), 2022-09-12
Supplement: rmdopen-2022-002514supp001.pdf [file rmdopen-2022-002514supp001.pdf]

# Supplementary Material

**Table S1. BASDAI components stratified by gender**

**Table S2 . Effect of gender on disease activity assessed by BASDAI**

**Table S3 . Effect of gender on disease activity assessed by ASDAS**

**Table S4 . Effect of gender on functional ability (BASFI)**

**Table S5. Effect of gender on CRP, overall health (ASAS HI) and quality of life (EQ-5D)**

| <b>Table S1. BASDAI components stratified by gender</b> |                                    |                                     |                |
|---------------------------------------------------------|------------------------------------|-------------------------------------|----------------|
| <b>Total axSpA<br/>n=2719</b>                           | <b>Male<br/>n= 1858<br/>(68.3)</b> | <b>Female<br/>n= 861<br/>(31.7)</b> | <b>p-value</b> |
| BASDAI Q1 (0-10)                                        | 4.2 (2.8)                          | 5.1 (2.7)                           | <0.001         |
| BASDAI Q2 (0-10)                                        | 4.3 (2.9)                          | 4.9 (3.0)                           | <0.001         |
| BASDAI Q3 (0-10)                                        | 2.6 (2.8)                          | 3.3 (3.0)                           | <0.001         |
| BASDAI Q4 (0-10)                                        | 3.0 (2.9)                          | 3.9 (3.2)                           | <0.001         |
| BASDAI Q5 (0-10)                                        | 3.6 (3.0)                          | 4.1 (3.1)                           | <0.001         |
| BASDAI Q6 (0-10)                                        | 2.7 (2.7)                          | 3.0 (2.8)                           | 0.03           |
| <b>Total pSpA<br/>n= 433</b>                            | <b>Male<br/>n= 203<br/>(46.8)</b>  | <b>Female<br/>n= 230<br/>(53.2)</b> | <b>p-value</b> |
| BASDAI Q1 (0-10)                                        | 3.8 (2.7)                          | 5.3 (2.7)                           | <0.001         |
| BASDAI Q2 (0-10)                                        | 3.2 (3.0)                          | 4.6 (3.3)                           | <0.001         |
| BASDAI Q3 (0-10)                                        | 3.6 (3.1)                          | 4.4 (3.0)                           | 0.002          |
| BASDAI Q4 (0-10)                                        | 3.3 (3.0)                          | 5.2 (3.1)                           | <0.001         |
| BASDAI Q5 (0-10)                                        | 3.1 (2.8)                          | 4.2 (3.3)                           | <0.001         |
| BASDAI Q6 (0-10)                                        | 2.5 (2.6)                          | 2.6 (2.6)                           | 0.72           |
| <b>Total PsA<br/>n= 1033</b>                            | <b>Male<br/>n= 501<br/>(48.5)</b>  | <b>Female<br/>n= 532<br/>(51.5)</b> | <b>p-value</b> |
| BASDAI Q1 (0-10)                                        | 4.1 (2.7)                          | 5.7 (2.7)                           | <0.001         |
| BASDAI Q2 (0-10)                                        | 3.4 (3.1)                          | 4.9 (3.3)                           | <0.001         |
| BASDAI Q3 (0-10)                                        | 3.7 (3.0)                          | 5.1 (3.0)                           | <0.001         |
| BASDAI Q4 (0-10)                                        | 3.5 (3.0)                          | 5.2 (3.1)                           | <0.001         |
| BASDAI Q5 (0-10)                                        | 3.4 (3.0)                          | 4.8 (3.1)                           | <0.001         |
| BASDAI Q6 (0-10)                                        | 2.4 (2.7)                          | 3.4 (2.9)                           | <0.001         |

| <b>Table S2 . Effect of gender on disease activity assessed by BASDAI</b>                                                                                                                                                                                                                                                                                                |                             |                            |                           |
|--------------------------------------------------------------------------------------------------------------------------------------------------------------------------------------------------------------------------------------------------------------------------------------------------------------------------------------------------------------------------|-----------------------------|----------------------------|---------------------------|
| <b>Assessment</b>                                                                                                                                                                                                                                                                                                                                                        | <b>axSpA<br/>β (95% CI)</b> | <b>pSpA<br/>β (95% CI)</b> | <b>PsA<br/>β (95% CI)</b> |
|                                                                                                                                                                                                                                                                                                                                                                          | n=2705                      | n=429                      | n=1019                    |
| Age (years)                                                                                                                                                                                                                                                                                                                                                              | 0.006 (-0.001, 0.014)       | -0.008 (-0.026, 0.010)     | -0.01 (-0.02, 0.001)      |
| Gender (female vs male)                                                                                                                                                                                                                                                                                                                                                  | <b>0.39 (0.20, 0.58)</b>    | <b>1.22 (0.77, 1.68)</b>   | <b>0.87 (0.59, 1.16)</b>  |
| Education                                                                                                                                                                                                                                                                                                                                                                |                             |                            |                           |
| University                                                                                                                                                                                                                                                                                                                                                               | Ref                         | Ref                        | Ref                       |
| Secondary studies                                                                                                                                                                                                                                                                                                                                                        | <b>0.49 (0.31, 0.67)</b>    | <b>0.48 (0.03, 0.94)</b>   | <b>0.68 (0.36, 0.99)</b>  |
| Primary studies                                                                                                                                                                                                                                                                                                                                                          | <b>0.65 (0.38, 0.91)</b>    | 0.11 (-0.58, 0.79)         | <b>0.70 (0.30, 1.11)</b>  |
| Marital status                                                                                                                                                                                                                                                                                                                                                           |                             |                            |                           |
| Married                                                                                                                                                                                                                                                                                                                                                                  | Ref                         | Ref                        | Ref                       |
| Single                                                                                                                                                                                                                                                                                                                                                                   | 0.05 (-0.16, 0.25)          | 0.39 (-0.14, 0.91)         | 0.082 (-0.31, 0.47)       |
| Divorced or widow                                                                                                                                                                                                                                                                                                                                                        | <b>0.42 (0.07, 0.77)</b>    | 0.42 (-0.50, 1.33)         | 0.37 (-0.05, 0.79)        |
| BMI (Kg/m <sup>2</sup> )                                                                                                                                                                                                                                                                                                                                                 | <b>0.05 (0.03, 0.07)</b>    | <b>0.07 (0.02, 0.11)</b>   | 0.02 (-0.007, 0.04)       |
| Smoking (current or past vs never smoker)                                                                                                                                                                                                                                                                                                                                | <b>0.25 (0.07, 0.43)</b>    | -0.05 (-0.54, 0.44)        | 0.09 (-0.19, 0.37)        |
| Axial involvement (yes vs no)                                                                                                                                                                                                                                                                                                                                            | <b>0.58 (0.05, 1.12)</b>    | 0.34 (-0.11, 0.79)         | <b>0.65 (0.36, 0.95)</b>  |
| Peripheral arthritis (yes vs no)                                                                                                                                                                                                                                                                                                                                         | <b>0.62 (0.43, 0.81)</b>    | -0.12 (-1.04, 0.81)        | 0.13 (-0.36, 0.62)        |
| Enthesitis (yes vs no)                                                                                                                                                                                                                                                                                                                                                   | <b>0.22 (0.05, 0.40)</b>    | 0.40 (-0.03, 0.84)         | <b>0.51 (0.23, 0.79)</b>  |
| Psoriasis (yes vs no)                                                                                                                                                                                                                                                                                                                                                    | -0.07 (-0.4, 0.26)          | 0.05 (-0.58, 0.68)         | 0.12 (-0.39, 0.63)        |
| Fibromyalgia (yes vs no)                                                                                                                                                                                                                                                                                                                                                 | <b>1.62 (1.29, 1.94)</b>    | 0.30 (-0.45, 1.05)         | <b>1.66 (1.21, 2.11)</b>  |
| NSAIDs current intake                                                                                                                                                                                                                                                                                                                                                    | <b>0.75 (0.55, 0.95)</b>    | <b>1.02 (0.52, 1.53)</b>   | <b>0.50 (0.21, 0.80)</b>  |
| Steroids intake                                                                                                                                                                                                                                                                                                                                                          | 0.27 (-0.05, 0.59)          | <b>0.96 (0.44, 1.48)</b>   | <b>0.69 (0.34, 1.04)</b>  |
| bDMARDs since diagnosis                                                                                                                                                                                                                                                                                                                                                  | <b>-0.21 (-0.39, -0.02)</b> | -0.25 (-0.70, 0.20)        | -0.11 (-0.41, 0.18)       |
| Results from multilevel multivariable linear and logistic regression analyses.<br>*Estimates with p<0.05 are highlighted in bold.<br>‡ Not included in the model.<br>BASDAI, Bath Ankylosing Spondylitis Disease Activity Index; BMI, Body Mass Index; NSAIDs, Non-steroidal Anti-Inflammatory Drugs; bDMARDs, biologic synthetic Disease Modifying Antirheumatic Drugs. |                             |                            |                           |

| <b>Table S3 . Effect of gender on disease activity assessed by ASDAS</b>                                                                                                                                                                                                                                                                                                                                   |                             |                            |                           |
|------------------------------------------------------------------------------------------------------------------------------------------------------------------------------------------------------------------------------------------------------------------------------------------------------------------------------------------------------------------------------------------------------------|-----------------------------|----------------------------|---------------------------|
| <b>Assessment</b>                                                                                                                                                                                                                                                                                                                                                                                          | <b>axSpA<br/>β (95% CI)</b> | <b>pSpA<br/>β (95% CI)</b> | <b>PsA<br/>β (95% CI)</b> |
|                                                                                                                                                                                                                                                                                                                                                                                                            | n=2671                      | n=426                      | n=1009                    |
| Age (years)                                                                                                                                                                                                                                                                                                                                                                                                | 0.001 (-0.003, 0.004)       | -0.004 (-0.013, 0.004)     | -0.002 (-0.007, 0.004)    |
| Gender (female vs male)                                                                                                                                                                                                                                                                                                                                                                                    | 0.02 (-0.07, 0.10)          | <b>0.36 (0.15, 0.58)</b>   | <b>0.25 (0.12, 0.38)</b>  |
| Education                                                                                                                                                                                                                                                                                                                                                                                                  |                             |                            |                           |
| University                                                                                                                                                                                                                                                                                                                                                                                                 | Ref                         | Ref                        | Ref                       |
| Secondary studies                                                                                                                                                                                                                                                                                                                                                                                          | <b>0.26 (0.17, 0.35)</b>    | 0.23 (0.02, 0.44)          | <b>0.30 (0.16, 0.45)</b>  |
| Primary studies                                                                                                                                                                                                                                                                                                                                                                                            | <b>0.38 (0.27, 0.51)</b>    | 0.13 (-0.20, 0.45)         | <b>0.38 (0.19, 0.56)</b>  |
| Marital status                                                                                                                                                                                                                                                                                                                                                                                             |                             |                            |                           |
| Married                                                                                                                                                                                                                                                                                                                                                                                                    | Ref                         | Ref                        | Ref                       |
| Single                                                                                                                                                                                                                                                                                                                                                                                                     | 0.10 (-0.002, 0.19)         | 0.08 (-0.17, 0.32)         | 0.10 (-0.08, 0.28)        |
| Divorced or widow                                                                                                                                                                                                                                                                                                                                                                                          | <b>0.27 (0.10, 0.43)</b>    | 0.20 (-0.22, 0.62)         | 0.11 (-0.08, 0.30)        |
| BMI (Kg/m <sup>2</sup> )                                                                                                                                                                                                                                                                                                                                                                                   | <b>0.03 (0.02, 0.04)</b>    | <b>0.03 (0.01, 0.05)</b>   | <b>0.02 (0.01, 0.03)</b>  |
| Smoking (current or past vs never smoker)                                                                                                                                                                                                                                                                                                                                                                  | <b>0.15 (0.07, 0.24)</b>    | 0.04 (-0.19, 0.27)         | 0.03 (-0.10, 0.15)        |
| Axial involvement (yes vs no)                                                                                                                                                                                                                                                                                                                                                                              | <b>0.37 (0.11, 0.63)</b>    | 0.19 (-0.02, 0.41)         | <b>0.24 (0.10, 0.37)</b>  |
| Peripheral arthritis (yes vs no)                                                                                                                                                                                                                                                                                                                                                                           | <b>0.22 (0.13, 0.32)</b>    | 0.06 (-0.36, 0.49)         | -0.02 (-0.25, 0.21)       |
| Enthesitis (yes vs no)                                                                                                                                                                                                                                                                                                                                                                                     | <b>0.08 (-0.01, 0.16)</b>   | 0.20 (-0.01, 0.40)         | <b>0.17 (0.04, 0.30)</b>  |
| Fibromyalgia (yes vs no)                                                                                                                                                                                                                                                                                                                                                                                   | <b>0.50 (0.34, 0.65)</b>    | -0.01 (-0.36, 0.34)        | <b>0.57 (0.36, 0.77)</b>  |
| NSAIDs current intake                                                                                                                                                                                                                                                                                                                                                                                      | <b>0.41 (0.32, 0.50)</b>    | <b>0.52 (0.28, 0.76)</b>   | <b>0.35 (0.19, 0.51)</b>  |
| Steroids intake                                                                                                                                                                                                                                                                                                                                                                                            | <b>0.31 (0.16, 0.46)</b>    | <b>0.67 (0.42, 0.91)</b>   | <b>0.40 (0.30, 0.50)</b>  |
| csDMARDs since diagnosis                                                                                                                                                                                                                                                                                                                                                                                   | <b>0.11 (0.02, 0.20)</b>    | 0.21 (-0.10, 0.52)         | -0.017 (-0.27, 0.24)      |
| bDMARDs since diagnosis                                                                                                                                                                                                                                                                                                                                                                                    | <b>-0.12 (-0.20, -0.03)</b> | -0.17 (-0.38, 0.04)        | -0.04 (-0.18, 0.10)       |
| Results from multilevel multivariable linear and logistic regression analyses.<br>*Estimates with p<0.05 are highlighted in bold.<br>ASDAS, Ankylosing Spondylitis Disease Activity Score; BMI, Body Mass Index; NSAIDs, Non-steroidal Anti-Inflammatory Drugs; csDMARDs, conventional synthetic Disease Modifying Antirheumatic Drugs; bDMARDs, biologic synthetic Disease Modifying Antirheumatic Drugs. |                             |                            |                           |

| <b>Table S4 . Effect of gender on functional ability (BASFI)</b>                                                                                                                                                                                                                                                                                                                                                                                                          |                             |                            |                            |
|---------------------------------------------------------------------------------------------------------------------------------------------------------------------------------------------------------------------------------------------------------------------------------------------------------------------------------------------------------------------------------------------------------------------------------------------------------------------------|-----------------------------|----------------------------|----------------------------|
| <b>Assessment</b>                                                                                                                                                                                                                                                                                                                                                                                                                                                         | <b>axSpA<br/>β (95% CI)</b> | <b>pSpA<br/>β (95% CI)</b> | <b>PsA<br/>β (95% CI)</b>  |
|                                                                                                                                                                                                                                                                                                                                                                                                                                                                           | n=2604                      | n=395                      | n=840                      |
| Age (years)                                                                                                                                                                                                                                                                                                                                                                                                                                                               | <b>0.036 (0.030, 0.043)</b> | <b>0.02 (0.003, 0.04)</b>  | <b>0.02 (0.012, 0.033)</b> |
| Gender (female vs male)                                                                                                                                                                                                                                                                                                                                                                                                                                                   | 0.01 (-0.14, 0.17)          | 0.30 (-0.12, 0.71)         | <b>0.46 (0.20, 0.72)</b>   |
| Education                                                                                                                                                                                                                                                                                                                                                                                                                                                                 |                             |                            |                            |
| University                                                                                                                                                                                                                                                                                                                                                                                                                                                                | Ref                         | Ref                        | Ref                        |
| Secondary studies                                                                                                                                                                                                                                                                                                                                                                                                                                                         | <b>0.25 (0.10, 0.40)</b>    | -0.12 (-0.54, 0.29)        | 0.11 (-0.19, 0.40)         |
| Primary studies                                                                                                                                                                                                                                                                                                                                                                                                                                                           | <b>0.37 (0.15, 0.59)</b>    | -0.04 (-0.67, 0.59)        | 0.27 (-0.10, 0.64)         |
| Marital status                                                                                                                                                                                                                                                                                                                                                                                                                                                            |                             |                            |                            |
| Married                                                                                                                                                                                                                                                                                                                                                                                                                                                                   | Ref                         | Ref                        | Ref                        |
| Single                                                                                                                                                                                                                                                                                                                                                                                                                                                                    | <b>0.27 (0.09, 0.44)</b>    | 0.13 (-0.36, 0.62)         | 0.140 (-0.22, 0.5)         |
| Divorced or widow                                                                                                                                                                                                                                                                                                                                                                                                                                                         | 0.16 (-0.13, 0.45)          | -0.08 (-0.88, 0.72)        | 0.23 (-0.14, 0.61)         |
| BMI (Kg/m <sup>2</sup> )                                                                                                                                                                                                                                                                                                                                                                                                                                                  | <b>0.02 (0.003, 0.03)</b>   | 0.03 (-0.007, 0.08)        | 0.007 (-0.015, 0.03)       |
| ASDAS                                                                                                                                                                                                                                                                                                                                                                                                                                                                     | <b>1.46 (1.39, 1.53)</b>    | <b>1.40 (1.22, 1.58)</b>   | <b>1.49 (1.37, 1.62)</b>   |
| mNY criteria (yes vs no)                                                                                                                                                                                                                                                                                                                                                                                                                                                  | <b>0.33 (0.16, 0.51)</b>    | 0.15 (-0.30, 0.59)         | 0.22 (-0.13, 0.57)         |
| Axial involvement (yes vs no)                                                                                                                                                                                                                                                                                                                                                                                                                                             | 0.021 (-0.45, 0.49)         | 0.12 (-0.34, 0.58)         | <b>0.38 (0.07, 0.70)</b>   |
| Fibromyalgia (yes vs no)                                                                                                                                                                                                                                                                                                                                                                                                                                                  | <b>0.81 (0.54, 1.08)</b>    | 0.20 (-0.50, 0.89)         | <b>0.87 (0.47, 1.27)</b>   |
| NSAIDs current intake                                                                                                                                                                                                                                                                                                                                                                                                                                                     | <b>0.17 (0.008, 0.34)</b>   | 0.03 (-0.45, 0.51)         | 0.13 (-0.14, 0.40)         |
| bDMARDs since diagnosis                                                                                                                                                                                                                                                                                                                                                                                                                                                   | <b>0.20 (0.04, 0.35)</b>    | 0.14 (-0.28, 0.56)         | <b>0.35 (0.08, 0.62)</b>   |
| Results from multilevel multivariable linear and logistic regression analyses.<br>*Estimates with p<0.05 are highlighted in bold.<br>BMI, Body Mass Index; BASFI, Bath Ankylosing Spondylitis Functional Index; ASDAS, Ankylosing Spondylitis Disease Activity Score; mNY criteria, radiographic axial spondyloarthritis by modified Ney York criteria; NSAIDs, Non-steroidal Anti-Inflammatory Drugs; bDMARDs, biologic synthetic Disease Modifying Antirheumatic Drugs. |                             |                            |                            |

| <b>Table S5. Effect of gender on CRP, overall health (ASAS HI) and quality of life (EQ-5D)</b>                                                                                                                                                                                                                                       |                                        |                                            |                                          |
|--------------------------------------------------------------------------------------------------------------------------------------------------------------------------------------------------------------------------------------------------------------------------------------------------------------------------------------|----------------------------------------|--------------------------------------------|------------------------------------------|
| <b>Independent variables</b>                                                                                                                                                                                                                                                                                                         | <b>CRP <math>\beta</math> (95% CI)</b> | <b>ASAS-HI <math>\beta</math> (95% CI)</b> | <b>EQ-5D <math>\beta</math> (95% CI)</b> |
|                                                                                                                                                                                                                                                                                                                                      | n=3861                                 | n=4116                                     | n=2785                                   |
| Gender (female vs male)                                                                                                                                                                                                                                                                                                              | -1.36 (-3.17, 0.44), 0.139             | 0.90 (0.70, 1.10), <0.001                  | -0.016 (-0.029, -0.003), 0.013           |
| Age (years)                                                                                                                                                                                                                                                                                                                          | -0.07 (-0.15, 0.005), 0.066            | -0.01 (-0.02, -0.004), 0.002               | 0.0006 (0.0001, 0.001), 0.020            |
| Education                                                                                                                                                                                                                                                                                                                            |                                        |                                            |                                          |
| University studies                                                                                                                                                                                                                                                                                                                   |                                        | Ref                                        | Ref                                      |
| Secondary studies                                                                                                                                                                                                                                                                                                                    | 2.03 (0.16, 3.91), 0.034               | 0.41 (0.20, 0.62), <0.001                  | -0.008 (-0.021, 0.004), 0.208            |
| Primary studies                                                                                                                                                                                                                                                                                                                      | 2.72 (0.06, 5.37), 0.045               | 0.62 (0.32, 0.92), <0.001                  | -0.021 (-0.040, -0.001), 0.037           |
| Marital status                                                                                                                                                                                                                                                                                                                       |                                        |                                            |                                          |
| Single                                                                                                                                                                                                                                                                                                                               | Ref                                    | Ref                                        | Ref                                      |
| Married                                                                                                                                                                                                                                                                                                                              | 2.48 (0.32, 4.64), 0.024               | -                                          | -                                        |
| Divorced or widow                                                                                                                                                                                                                                                                                                                    | 3.47 (0.22, 6.71), 0.036               | -                                          | -                                        |
| Body mass index (Kg/m <sup>2</sup> )                                                                                                                                                                                                                                                                                                 | 0.21 (0.04, 0.38), 0.015               | -                                          | 0.002 (0.0004, 0.002), 0.007             |
| Smoking (current or past vs never smoker)                                                                                                                                                                                                                                                                                            | -                                      | 0.28 (0.08, 0.47), 0.006                   | -0.017 (-0.029, -0.005), 0.007           |
| ASDAS                                                                                                                                                                                                                                                                                                                                | ‡                                      | 0.83 (0.72, 0.95), 0.006                   | -0.059 (-0.066, -0.052), <0.001          |
| BASFI                                                                                                                                                                                                                                                                                                                                | ‡                                      | 0.91 (0.86, 0.96), <0.001                  | -0.044 (-0.047, -0.040), <0.001          |
| mNY criteria (yes vs no)                                                                                                                                                                                                                                                                                                             | 3.54 (1.68, 5.40), <0.001              |                                            | 0.019 (0.006, 0.032), 0.003              |
| HLA-B27 positive (yes vs no)                                                                                                                                                                                                                                                                                                         | -                                      |                                            | 0.018 (0.004, 0.032), 0.011              |
| Peripheral arthritis (yes vs no)                                                                                                                                                                                                                                                                                                     | -                                      | 0.37 (0.16, 0.58), <0.001                  | -                                        |
| Enthesitis (yes vs no)                                                                                                                                                                                                                                                                                                               | -                                      | 0.59 (0.39, 0.78), <0.001                  | -0.014 (-0.026, -0.002), 0.020           |
| Dactylitis (yes vs no)                                                                                                                                                                                                                                                                                                               | -                                      | -                                          | -                                        |
| Uveitis (yes vs no)                                                                                                                                                                                                                                                                                                                  | -                                      | -                                          | -                                        |
| Fibromyalgia (yes vs no)                                                                                                                                                                                                                                                                                                             | -                                      | 1.27 (0.92, 1.62), 0.001                   | -0.036 (-0.058, -0.013), 0.002           |
| NSAIDs current intake                                                                                                                                                                                                                                                                                                                | 2.97 (1.07, 4.87), 0.002               | -                                          | -                                        |
| Steroids intake                                                                                                                                                                                                                                                                                                                      | 8.44 (5.71, 11.17), <0.001             | -                                          | -                                        |
| csDMARDs since diagnosis                                                                                                                                                                                                                                                                                                             | 3.46 (1.58, 5.33), <0.001              | -                                          | -                                        |
| Results from multilevel multivariable linear regression analyses.                                                                                                                                                                                                                                                                    |                                        |                                            |                                          |
| *Estimates with p<0.05 are highlighted in bold.                                                                                                                                                                                                                                                                                      |                                        |                                            |                                          |
| BMI, Body Mass Index; ASDAS, Ankylosing Spondylitis Disease Activity Score; BASFI, Bath Ankylosing Spondylitis Functional Index; mNY criteria, radiographic axial spondyloarthritis by modified New York criteria; NSAIDs, Non-steroidal Anti-Inflammatory Drugs; bDMARDs, biologic synthetic Disease Modifying Antirheumatic Drugs. |                                        |                                            |                                          |
